# Supplementary material for: Marine viruses discovered via metagenomics shed light on viral strategies throughout the oceans
Source: PubMed Central journal article supplement (PMC5504273; doi:10.1038/ncomms15955), 2017-07-05
Supplement: ncomms15955-s1.pdf [file ncomms15955-s1.pdf]

1 File Name: Supplementary Information  
2 Description: Supplementary Figures, Supplementary Tables and Supplementary References  
3  
4 File Name: Supplementary Dataset 1  
5 Description: Abundance profile of the MVCs and the reference phage genomes (rows) across the  
6 121 marine viromes (columns).  
7  
8 File Name: Supplementary Dataset 2  
9 Description: Functional and taxonomic annotation of the proteins encoded by the MVCs compared  
10 to the NCBI-nr database.  
11  
12 File Name: Supplementary Dataset 3  
13 Description: Circular neighbour-joining clustering of the MVCs (blue) and the reference phage  
14 genomes (red) based on Dice distances depicting the true branch lengths.  
15  
16 File Name: Supplementary Dataset 4  
17 Description: Circular neighbour-joining clustering of the MVCs (blue) and the reference phage  
18 genomes (red) based on Dice distances with the branch lengths omitted for better topology  
19 representation.  
20  
21 File Name: Supplementary Dataset 5  
22 Description: A summary of all 5 approaches used for host prediction and their respective scores for  
23 each MVC.  
24  
25 File Name: Supplementary Dataset 6  
26 Description: The statistics of the abundance profiles of the MVCs and the reference viral genomes  
27 across the 121 marine viromes.  
28  
29 File Name: Supplementary Dataset 7  
30 Description: Functional content derived from the MVCs and the reference phage genomes. The  
31 values represent the average number of occurrences of the KO in each group of phages according to  
32 the host phylum.  
33  
34 File Name: Supplementary Dataset 8  
35 Description: A list of the MVCs and the reference phages enriched or depleted in abundance among  
36 the tested samples groups.  
37  
38 File Name: Supplementary Dataset 9  
39 Description: A list of the KOs enriched or depleted in abundance among the tested samples groups.  
40  
41 File Name: Supplementary Dataset 10  
42 Description: A list of the bacterial and archaeal species enriched or depleted in abundance among  
43 the tested samples groups.  
44  
45

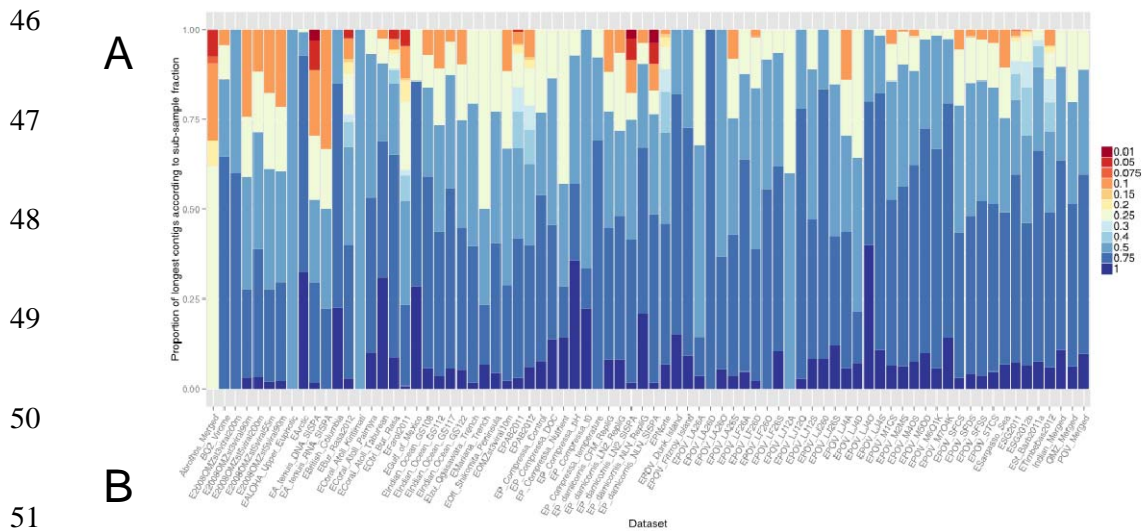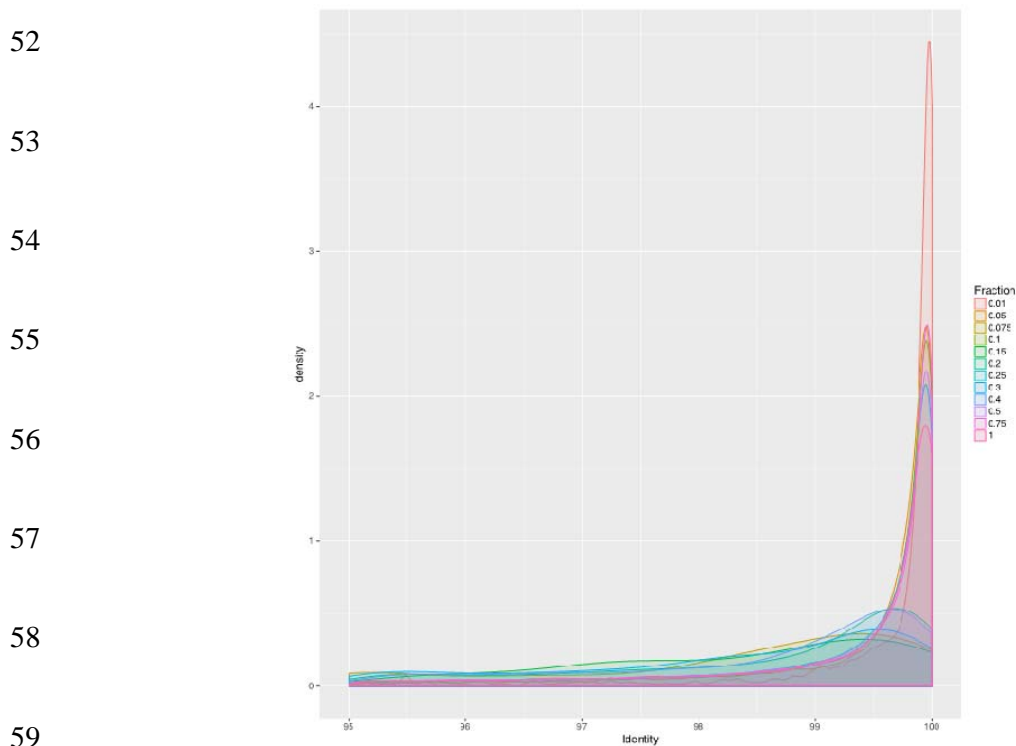

60 **Supplementary Figure 1:** Effect of random sub-sampling on virome assembly. Stacked  
 61 bar plots displaying the proportion of contigs obtained for each sub-sample (color coded  
 62 according to subsample size fractions) across each dataset. B) A density plot displaying  
 63 the distribution of identity values of the contigs to the cluster representative according to  
 64 the subsample fraction from which they are derived. The contigs from smaller subsamples  
 65 displayed high identity (> 98%) to the cluster representative.

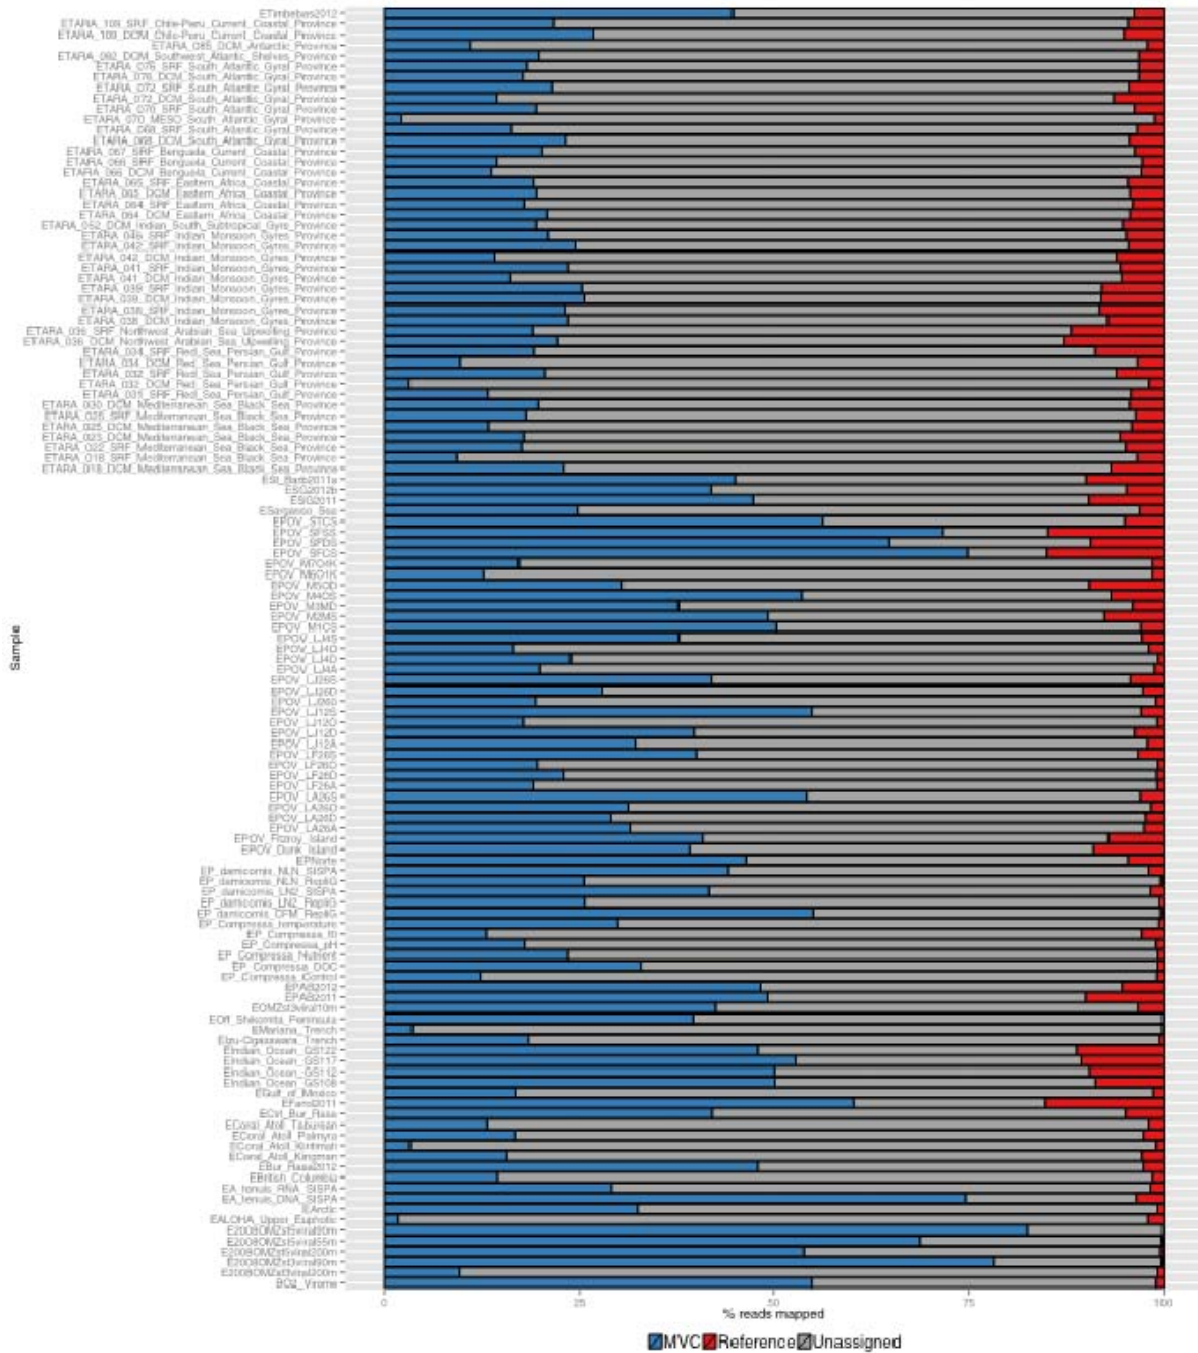

67 **Supplementary Figure 2:** Relative abundance of Unassigned reads (grey) or mapped to  
 68 MVCs (blue) or Reference Phage Genomes (Red) in the 121 analysed marine viromes.

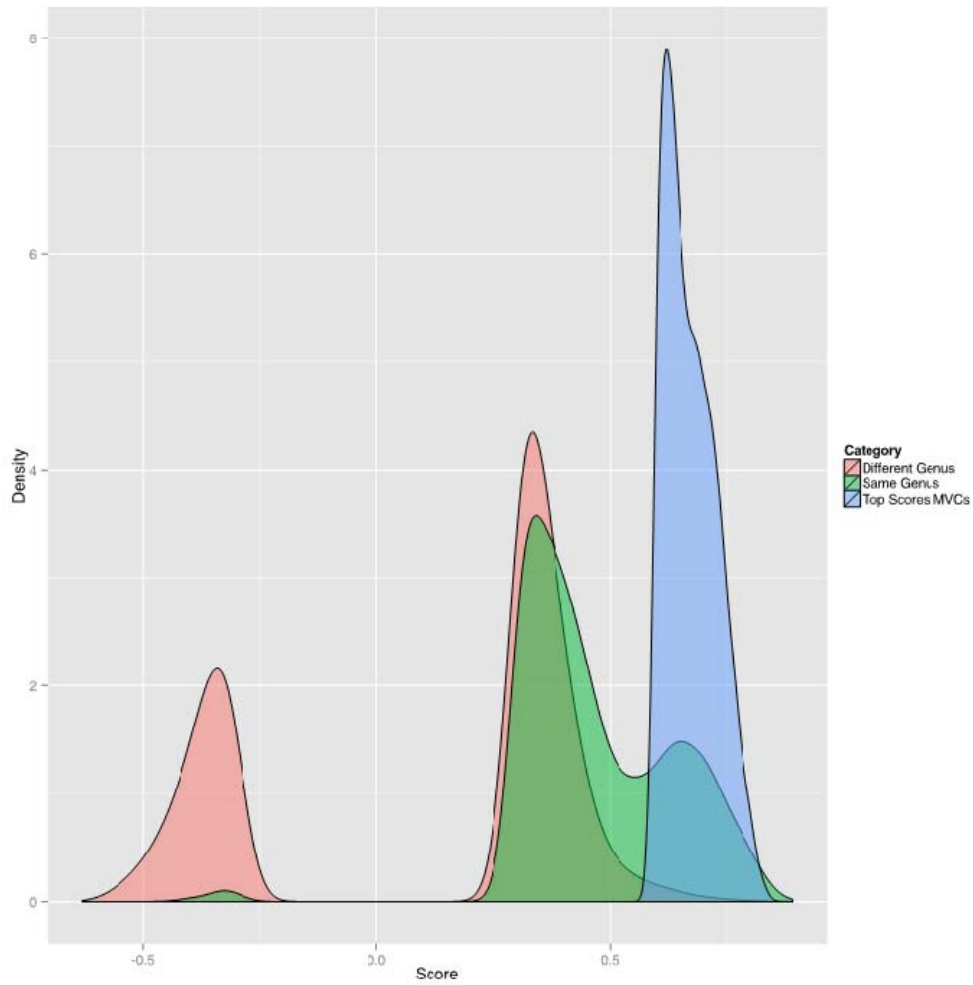

79

80 **Supplementary Figure 3:** Distribution of the SparCC correlation scores between  
81 prokaryotic viruses that infect a host of the same (green) or a different (red) genus. The top  
82 scores used to assign hosts to the MVCs are displayed in blue.

83

84

85

86

87

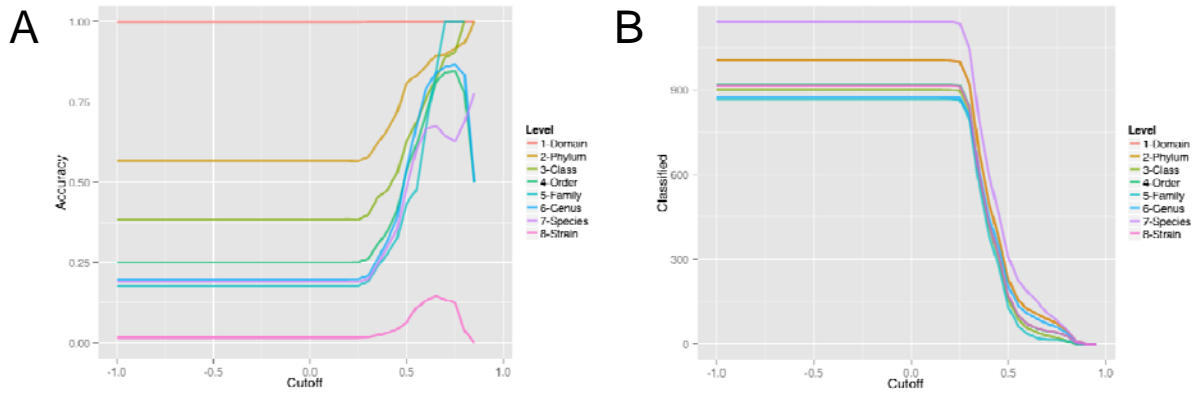

88 **Supplementary Figure 4:** Performance of the predictions based on the correlation scores  
89 for each taxonomic level. The X axis displays the minimum score of a correlation to be  
90 considered. A) The Y axis shows the accuracy of prediction. B) The Y axis shows the  
91 number of correlations in the network that fall within the established cut-off. The strongest  
92 scores detected (used for host prediction) were never below  $\sim 0.25$ . Hence, the lack of  
93 change in accuracy or the amount of predictions when the cut-off is set below the 0.25  
94 threshold.

95  
96  
97  
98  
99  
100  
101

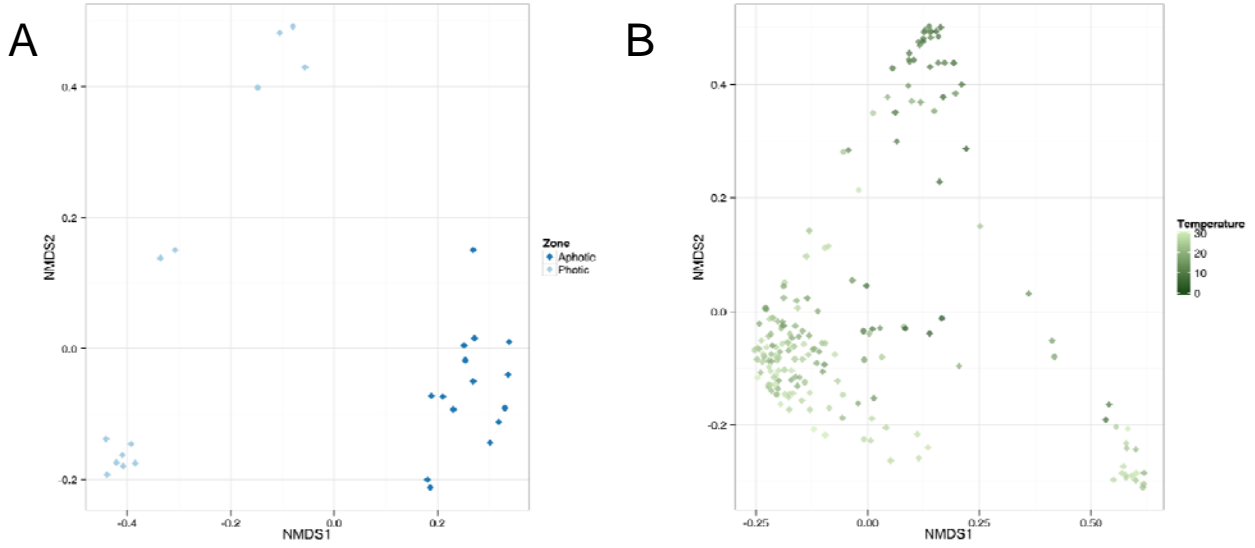

102 **Supplementary Figure 5:** Metagenome non-metric multidimensional scaling. The  
103 Manhattan distances were calculated based on prokaryote relative abundances estimated  
104 from cellular fraction microbial metagenomes and used as input for a NMDS analysis. The  
105 samples are colour coded according to their environmental features. A) SAO  
106 metagenomes. B) Tara oceans metagenomes.

107 **Supplementary Table 1: Description of samples used to obtain the MVCs.**

| File                           | Reads   | Bases      | Average_read_length | Reference                       |
|--------------------------------|---------|------------|---------------------|---------------------------------|
| EArctic.fasta                  | 686209  | 68059812   | 99.1823365768       | (Angly et al., 2006)            |
| EBritish_Columbia.fasta        | 414964  | 42392364   | 102.1591366962      | (Angly et al., 2006)            |
| EGulf_of_Mexico.fasta          | 262501  | 26674941   | 101.6184357393      | (Angly et al., 2006)            |
| ESargasso_Sea.fasta            | 397939  | 41510756   | 104.3143697903      | (Angly et al., 2006)            |
| E2008OMZst3viral200m.fasta     | 96706   | 15866963   | 164.0742353112      | (Cassman et al., 2012)          |
| E2008OMZst3viral90m.fasta      | 361488  | 91589530   | 253.3681062719      | (Cassman et al., 2012)          |
| E2008OMZst5viral200m.fasta     | 163531  | 39736791   | 242.9924051097      | (Cassman et al., 2012)          |
| E2008OMZst5viral55m.fasta      | 226628  | 55711738   | 245.8290149496      | (Cassman et al., 2012)          |
| E2008OMZst5viral90m.fasta      | 300835  | 75835231   | 252.0824737813      | (Cassman et al., 2012)          |
| EOMZst3viral10m.fasta          | 128441  | 31647476   | 246.3969916148      | (Cassman et al., 2012)          |
| ECoral_Atoll_Kingman.fasta     | 93744   | 10159186   | 108.3715864482      | (Dinsdale et al., 2008)         |
| ECoral_Atoll_Kiritimati.fasta  | 279882  | 30957642   | 110.6096211975      | (Dinsdale et al., 2008)         |
| ECoral_Atoll_Palmyra.fasta     | 318178  | 33347087   | 104.8063882481      | (Dinsdale et al., 2008)         |
| ECoral_Atoll_Taburean.fasta    | 378475  | 39422223   | 104.1607054627      | (Dinsdale et al., 2008)         |
| EPOV_Dunk_Island.fasta         | 116855  | 28955563   | 247.7905352788      | (Hurwitz & Sullivan, 2013)      |
| EPOV_Fitzroy_Island.fasta      | 82739   | 20889623   | 252.4761358005      | (Hurwitz & Sullivan, 2013)      |
| EPOV_LA26A.fasta               | 42118   | 13594261   | 322.7660620162      | (Hurwitz & Sullivan, 2013)      |
| EPOV_LA26D.fasta               | 68516   | 18627549   | 271.8715190612      | (Hurwitz & Sullivan, 2013)      |
| EPOV_LA26O.fasta               | 70596   | 19933260   | 282.356790753       | (Hurwitz & Sullivan, 2013)      |
| EPOV_LA26S.fasta               | 165256  | 48389605   | 292.8160248342      | (Hurwitz & Sullivan, 2013)      |
| EPOV_LF26A.fasta               | 167616  | 48027477   | 286.5327713345      | (Hurwitz & Sullivan, 2013)      |
| EPOV_LF26D.fasta               | 125896  | 33423420   | 265.4843680498      | (Hurwitz & Sullivan, 2013)      |
| EPOV_LF26O.fasta               | 147537  | 40546266   | 274.8210008337      | (Hurwitz & Sullivan, 2013)      |
| EPOV_LF26S.fasta               | 192685  | 59738160   | 310.0301528401      | (Hurwitz & Sullivan, 2013)      |
| EPOV_LJ12A.fasta               | 58108   | 20543960   | 353.5478763681      | (Hurwitz & Sullivan, 2013)      |
| EPOV_LJ12D.fasta               | 49914   | 13188982   | 264.234122691       | (Hurwitz & Sullivan, 2013)      |
| EPOV_LJ12O.fasta               | 122565  | 45941366   | 374.83266838        | (Hurwitz & Sullivan, 2013)      |
| EPOV_LJ12S.fasta               | 92415   | 22582412   | 244.3587296435      | (Hurwitz & Sullivan, 2013)      |
| EPOV_LJ26O.fasta               | 101179  | 28416547   | 280.8541989939      | (Hurwitz & Sullivan, 2013)      |
| EPOV_LJ26D.fasta               | 55332   | 14809960   | 267.6563290682      | (Hurwitz & Sullivan, 2013)      |
| EPOV_LJ26S.fasta               | 75036   | 19485257   | 259.6787808519      | (Hurwitz & Sullivan, 2013)      |
| EPOV_LJ4A.fasta                | 136876  | 44526523   | 325.305553932       | (Hurwitz & Sullivan, 2013)      |
| EPOV_LJ4D.fasta                | 98478   | 24169901   | 245.4345234469      | (Hurwitz & Sullivan, 2013)      |
| EPOV_LJ4O.fasta                | 97126   | 31475134   | 324.0649671561      | (Hurwitz & Sullivan, 2013)      |
| EPOV_LJ4S.fasta                | 107244  | 25738801   | 240.002247212       | (Hurwitz & Sullivan, 2013)      |
| EPOV_M1CS.fasta                | 303519  | 105200203  | 346.6017053298      | (Hurwitz & Sullivan, 2013)      |
| EPOV_M2MS.fasta                | 321754  | 92857788   | 288.5987058436      | (Hurwitz & Sullivan, 2013)      |
| EPOV_M3MD.fasta                | 31528   | 10927215   | 346.5876363867      | (Hurwitz & Sullivan, 2013)      |
| EPOV_M4OS.fasta                | 203238  | 52389322   | 257.7732609059      | (Hurwitz & Sullivan, 2013)      |
| EPOV_M5OD.fasta                | 156509  | 44009470   | 281.1944999968      | (Hurwitz & Sullivan, 2013)      |
| EPOV_M6O1K.fasta               | 225833  | 66311342   | 293.6299920738      | (Hurwitz & Sullivan, 2013)      |
| EPOV_M7O4K.fasta               | 144588  | 40451144   | 279.7683348549      | (Hurwitz & Sullivan, 2013)      |
| EPOV_SFCS.fasta                | 487339  | 191183563  | 392.3009711925      | (Hurwitz & Sullivan, 2013)      |
| EPOV_SFDS.fasta                | 645463  | 218687035  | 338.8064614083      | (Hurwitz & Sullivan, 2013)      |
| EPOV_SFFS.fasta                | 504826  | 173099948  | 342.8903186444      | (Hurwitz & Sullivan, 2013)      |
| EPOV_STCS.fasta                | 821404  | 246312846  | 299.8680868367      | (Hurwitz & Sullivan, 2013)      |
| BO2_Virome.fasta               | 2392879 | 855153008  | 357.3741121051      | (Solonenko et al., 2013)        |
| EP_Compressa_Control.fasta     | 39191   | 4065098    | 103.7252940726      | (Vega Thurber et al., 2008)     |
| EP_Compressa_DOC.fasta         | 35409   | 3620409    | 102.245446073       | (Vega Thurber et al., 2008)     |
| EP_Compressa_Nutrient.fasta    | 34139   | 3661593    | 107.2554263452      | (Vega Thurber et al., 2008)     |
| EP_Compressa_pH.fasta          | 49949   | 5234100    | 104.7888846624      | (Vega Thurber et al., 2008)     |
| EP_Compressa_t0.fasta          | 39113   | 3965136    | 101.3764221614      | (Vega Thurber et al., 2008)     |
| EP_Compressa_temperature.fasta | 38482   | 4364749    | 113.4231328933      | (Vega Thurber et al., 2008)     |
| EA_tennis_DNA_SISPA.fasta      | 1706540 | 528460555  | 309.6678396053      | (Weynberg et al., 2014)         |
| EA_tennis_RNA_SISPA.fasta      | 734031  | 215417970  | 293.4725781336      | (Weynberg et al., 2014)         |
| EP_damicornis_CFM_RepliG.fasta | 370135  | 100597355  | 271.785578235       | (Weynberg et al., 2014)         |
| EP_damicornis_LN2_RepliG.fasta | 292476  | 82138284   | 280.8376892463      | (Weynberg et al., 2014)         |
| EP_damicornis_LN2_SISPA.fasta  | 2000000 | 585709573  | 292.8547865         | (Weynberg et al., 2014)         |
| EP_damicornis_NLN_RepliG.fasta | 435494  | 122300721  | 280.8321607186      | (Weynberg et al., 2014)         |
| EP_damicornis_NLN_SISPA.fasta  | 2000000 | 604563712  | 302.281856          | (Weynberg et al., 2014)         |
| EIndian_Ocean_GS108.fasta      | 320104  | 125242428  | 391.2554294854      | (Williamson et al., 2012)       |
| EIndian_Ocean_GS112.fasta      | 494832  | 178668377  | 361.0687607107      | (Williamson et al., 2012)       |
| EIndian_Ocean_GS117.fasta      | 480375  | 194370437  | 404.6222992454      | (Williamson et al., 2012)       |
| EIndian_Ocean_GS122.fasta      | 341386  | 119422171  | 349.8156661375      | (Williamson et al., 2012)       |
| Elzu-Ogasawara_Trench.fasta    | 46458   | 15606815   | 335.9338542339      | (Yoshida et al., 2013)          |
| EMariana_Trench.fasta          | 49584   | 13814785   | 278.6137665376      | (Yoshida et al., 2013)          |
| EOff_Shikomita_Peninsula.fasta | 76498   | 27935812   | 365.1835603545      | (Yoshida et al., 2013)          |
| EBur_Rasa2012.fasta            | 1943193 | 324123509  | 166.799442464       | Silveira et al., 2016. In press |
| ECtrl_Bur_Rasa.fasta           | 2927179 | 565986037  | 193.3554582757      | Silveira et al., 2016. In press |
| EFarol2011.fasta               | 5309048 | 1111783405 | 209.4129503067      | Silveira et al., 2016. In press |
| EPAB2011.fasta                 | 3353950 | 657983006  | 196.1815191043      | Silveira et al., 2016. In press |
| EPAB2012.fasta                 | 870827  | 182837271  | 209.9582018013      | Silveira et al., 2016. In press |

| Sample                   | Abrolhos_Season | POV_Depth | TARA_Temp |
|--------------------------|-----------------|-----------|-----------|
| BO2_Virome               | ignore          | ignore    | ignore    |
| E2008OMZst3viral200m     | ignore          | ignore    | ignore    |
| E2008OMZst3viral90m      | ignore          | ignore    | ignore    |
| E2008OMZst5viral200m     | ignore          | ignore    | ignore    |
| E2008OMZst5viral55m      | ignore          | ignore    | ignore    |
| E2008OMZst5viral90m      | ignore          | ignore    | ignore    |
| EALOHA_Upper_Euphotic    | ignore          | ignore    | ignore    |
| EA_tenuis_DNA_SISPA      | ignore          | ignore    | ignore    |
| EA_tenuis_RNA_SISPA      | ignore          | ignore    | ignore    |
| EArctic                  | ignore          | ignore    | ignore    |
| EBritish_Columbia        | ignore          | ignore    | ignore    |
| EBur_Rasa2012            | ignore          | ignore    | ignore    |
| ECoral_Atoll_Kingman     | ignore          | ignore    | ignore    |
| ECoral_Atoll_Kiritimati  | ignore          | ignore    | ignore    |
| ECoral_Atoll_Palmyra     | ignore          | ignore    | ignore    |
| ECoral_Atoll_Taburean    | ignore          | ignore    | ignore    |
| ECtrl_Bur_Rasa           | ignore          | ignore    | ignore    |
| EFarol2011               |                 | 2011      | ignore    |
| EGulf_of_Mexico          | ignore          | ignore    | ignore    |
| EIndian_Ocean_GS108      | ignore          | ignore    | ignore    |
| EIndian_Ocean_GS112      | ignore          | ignore    | ignore    |
| EIndian_Ocean_GS117      | ignore          | ignore    | ignore    |
| EIndian_Ocean_GS122      | ignore          | ignore    | ignore    |
| Elzu-Ogasawara_Trench    | ignore          | ignore    | ignore    |
| EMariana_Trench          | ignore          | ignore    | ignore    |
| EOMZst3viral10m          | ignore          | ignore    | ignore    |
| EOff_Shikomita_Peninsula | ignore          | ignore    | ignore    |
| EPA2011                  |                 | 2011      | ignore    |
| EPAB2012                 |                 | 2012      | ignore    |
| EPNorte                  |                 | 2012      | ignore    |
| EPOV_Dunk_Island         | ignore          | Photic    | ignore    |
| EPOV_Fitzroy_Island      | ignore          | Photic    | ignore    |
| EPOV_LA26A               | ignore          | Aphotic   | ignore    |
| EPOV_LA26D               | ignore          | Aphotic   | ignore    |
| EPOV_LA26O               | ignore          | Aphotic   | ignore    |
| EPOV_LA26S               | ignore          | Photic    | ignore    |
| EPOV_LF26A               | ignore          | Aphotic   | ignore    |
| EPOV_LF26D               | ignore          | Aphotic   | ignore    |
| EPOV_LF26O               | ignore          | Aphotic   | ignore    |
| EPOV_LF26S               | ignore          | Photic    | ignore    |
| EPOV_LJ12A               | ignore          | Aphotic   | ignore    |
| EPOV_LJ12D               | ignore          | Aphotic   | ignore    |
| EPOV_LJ12O               | ignore          | Aphotic   | ignore    |
| EPOV_LJ12S               | ignore          | Photic    | ignore    |
| EPOV_LJ260               | ignore          | Aphotic   | ignore    |
| EPOV_LJ26D               | ignore          | Aphotic   | ignore    |
| EPOV_LJ26S               | ignore          | Photic    | ignore    |
| EPOV_LJ4A                | ignore          | Aphotic   | ignore    |
| EPOV_LJ4D                | ignore          | Aphotic   | ignore    |
| EPOV_LJ4O                | ignore          | Aphotic   | ignore    |
| EPOV_LJ4S                | ignore          | Photic    | ignore    |
| EPOV_M1CS                | ignore          | Photic    | ignore    |
| EPOV_M2MS                | ignore          | Photic    | ignore    |
| EPOV_M3MD                | ignore          | Photic    | ignore    |
| EPOV_M4OS                | ignore          | Photic    | ignore    |
| EPOV_M5OD                | ignore          | Photic    | ignore    |
| EPOV_M601K               | ignore          | Aphotic   | ignore    |
| EPOV_M704K               | ignore          | Aphotic   | ignore    |
| EPOV_SFCS                | ignore          | Photic    | ignore    |
| EPOV_SFDS                | ignore          | Photic    | ignore    |
| EPOV_SFSS                | ignore          | Photic    | ignore    |
| EPOV_STCS                | ignore          | Photic    | ignore    |



126 Supplementary Table 2: Listing of sample groupings used for the enrichment analyzes.

|                                                          |        |        |        |
|----------------------------------------------------------|--------|--------|--------|
| EP_Compressa_Control                                     | ignore | ignore | ignore |
| EP_Compressa_DOC                                         | ignore | ignore | ignore |
| EP_Compressa_Nutrient                                    | ignore | ignore | ignore |
| EP_Compressa_pH                                          | ignore | ignore | ignore |
| EP_Compressa_t0                                          | ignore | ignore | ignore |
| EP_Compressa_temperature                                 | ignore | ignore | ignore |
| EP_damicornis_CFM_ReplIG                                 | ignore | ignore | ignore |
| EP_damicornis_LN2_ReplIG                                 | ignore | ignore | ignore |
| EP_damicornis_LN2_SISPA                                  | ignore | ignore | ignore |
| EP_damicornis_NLN_ReplIG                                 | ignore | ignore | ignore |
| EP_damicornis_NLN_SISPA                                  | ignore | ignore | ignore |
| ESG2011                                                  |        | 2011   | ignore |
| ESG2012b                                                 |        | 2012   | ignore |
| ESargasso_Sea                                            | ignore |        | ignore |
| Est_Barb2011a                                            |        | 2011   | ignore |
| ETARA_018_DCM_Mediterranean_Sea_Black_Sea_Province       | ignore |        | Cold   |
| ETARA_018_SRF_Mediterranean_Sea_Black_Sea_Province       | ignore |        | Cold   |
| ETARA_022_SRF_Mediterranean_Sea_Black_Sea_Province       | ignore |        | Cold   |
| ETARA_023_DCM_Mediterranean_Sea_Black_Sea_Province       | ignore |        | Cold   |
| ETARA_025_DCM_Mediterranean_Sea_Black_Sea_Province       | ignore |        | Cold   |
| ETARA_025_SRF_Mediterranean_Sea_Black_Sea_Province       | ignore |        | Cold   |
| ETARA_030_DCM_Mediterranean_Sea_Black_Sea_Province       | ignore |        | Cold   |
| ETARA_031_SRF_Red_Sea_Persian_Gulf_Province              | ignore |        | Warm   |
| ETARA_032_DCM_Red_Sea_Persian_Gulf_Province              | ignore |        | Warm   |
| ETARA_032_SRF_Red_Sea_Persian_Gulf_Province              | ignore |        | Warm   |
| ETARA_034_DCM_Red_Sea_Persian_Gulf_Province              | ignore |        | Warm   |
| ETARA_034_SRF_Red_Sea_Persian_Gulf_Province              | ignore |        | Warm   |
| ETARA_036_DCM_Northw est_Arabian_Sea_Upw elling_Province | ignore |        | Warm   |
| ETARA_036_SRF_Northw est_Arabian_Sea_Upw elling_Province | ignore |        | Warm   |
| ETARA_038_DCM_Indian_Monsoon_Gyres_Province              | ignore |        | Warm   |
| ETARA_038_SRF_Indian_Monsoon_Gyres_Province              | ignore |        | Warm   |
| ETARA_039_DCM_Indian_Monsoon_Gyres_Province              | ignore |        | Warm   |
| ETARA_039_SRF_Indian_Monsoon_Gyres_Province              | ignore |        | Warm   |
| ETARA_041_DCM_Indian_Monsoon_Gyres_Province              | ignore |        | Warm   |
| ETARA_041_SRF_Indian_Monsoon_Gyres_Province              | ignore |        | Warm   |
| ETARA_042_DCM_Indian_Monsoon_Gyres_Province              | ignore |        | Warm   |
| ETARA_042_SRF_Indian_Monsoon_Gyres_Province              | ignore |        | Warm   |
| ETARA_046_SRF_Indian_Monsoon_Gyres_Province              | ignore |        | Warm   |
| ETARA_052_DCM_Indian_South_Subtropical_Gyre_Province     | ignore |        | Warm   |
| ETARA_064_DCM_Eastern_Africa_Coastal_Province            | ignore |        | Warm   |
| ETARA_064_SRF_Eastern_Africa_Coastal_Province            | ignore |        | Warm   |
| ETARA_065_DCM_Eastern_Africa_Coastal_Province            | ignore |        | Warm   |
| ETARA_065_SRF_Eastern_Africa_Coastal_Province            | ignore |        | Warm   |
| ETARA_066_DCM_Benguela_Current_Coastal_Province          | ignore |        | Cold   |
| ETARA_066_SRF_Benguela_Current_Coastal_Province          | ignore |        | Cold   |
| ETARA_067_SRF_Benguela_Current_Coastal_Province          | ignore |        | Cold   |
| ETARA_068_DCM_South_Atlantic_Gyral_Province              | ignore |        | Cold   |
| ETARA_068_SRF_South_Atlantic_Gyral_Province              | ignore |        | Cold   |
| ETARA_070_MESO_South_Atlantic_Gyral_Province             | ignore |        | Cold   |
| ETARA_070_SRF_South_Atlantic_Gyral_Province              | ignore |        | Cold   |
| ETARA_072_DCM_South_Atlantic_Gyral_Province              | ignore |        | Warm   |
| ETARA_072_SRF_South_Atlantic_Gyral_Province              | ignore |        | Warm   |
| ETARA_076_DCM_South_Atlantic_Gyral_Province              | ignore |        | Cold   |
| ETARA_076_SRF_South_Atlantic_Gyral_Province              | ignore |        | Cold   |
| ETARA_082_DCM_Southw est_Atlantic_Shelves_Province       | ignore |        | Cold   |
| ETARA_085_DCM_Antarctic_Province                         | ignore |        | Cold   |
| ETARA_109_DCM_Chile-Peru_Current_Coastal_Province        | ignore |        | Warm   |
| ETARA_109_SRF_Chile-Peru_Current_Coastal_Province        | ignore |        | Warm   |
| Etimbebas2012                                            |        | 2012   | ignore |

127

128

129 **Supplementary Table 3: Correlation scores between the viruses and the hosts across the**

| Microbe                     | Spearman_Score_Abundance | p_value_Abundance     | Spearman_Score_VHR | p_value_VHR           | Intercept     | Coefficient       | Median_VHR            |
|-----------------------------|--------------------------|-----------------------|--------------------|-----------------------|---------------|-------------------|-----------------------|
| Acholeplasma                | -0.0897435897            | 0.6551148366          | -0.7918192918      | 2.77485041906018E-006 | 2.6390947056  | -221.356320944    | 0.0006731856          |
| Burkholderia                | 0.0706766917             | 0.7673301273          | -0.7518796992      | 0.0002005705          | 0.3933706386  | -0.4911575602     | 0.0778090613          |
| Candidatus_Pelagibacter     | 0.7207207207             | 1.91486869488262E-006 | -0.5933075933      | 0.0001825509          | 7.0776174966  | -0.206169233      | 0.5096964592          |
| Candidatus_Puniceispirillum | 0.0535714286             | 0.8525093768          | -0.7178571429      | 0.0035697913          | 0.8253670301  | -0.482693615      | 0.4417823791          |
| Clostridium                 | 0.1605616606             | 0.421987618           | -0.8424908425      | 1.63711885751082E-006 | 1.5244503504  | -2.4583227373     | 0.0886579336          |
| Croceibacter                | 0.2295652174             | 0.2792184609          | -0.8695652174      | 2.51572197322635E-006 | 0.7746601981  | -30.9133058485    | 0.0011361179          |
| Exiguobacterium             | -0.0457368718            | 0.8403574467          | -0.7312252964      | 0.0001678697          | 0.3507201017  | -4.4213806776     | 0.0005415427          |
| Fusobacterium               | 0.3415384615             | 0.0882030026          | -0.8618803419      | 1.88156236780931E-006 | 0.1832144858  | -0.3048264016     | 0.1021796689          |
| Haloquadratum               | -0.0336122076            | 0.8412189805          | -0.0697196446      | 0.6774607402          | 3.3308065431  | -13789.8936628182 | 0                     |
| Leptospira                  | -0.0012870013            | 0.994621753           | -0.7292149292      | 1.41832304552279E-006 | 1.8757868748  | -10.1811706671    | 0.0117860692          |
| Leuconostoc                 | 0.3081554461             | 0.1107833117          | -0.741652983       | 1.15855424126558E-005 | 0.7661340972  | -21.4115177414    | 0.0034241717          |
| Magnetospirillum            | -0.2631578947            | 0.2751840936          | -0.601754386       | 0.0075105622          | 0.3000664676  | -0.516229263      | 0.0062252617          |
| Marinomonas                 | -0.1168831169            | 0.6127360376          | -0.6662337662      | 0.0013002749          | 1.1968707761  | -599.2463695185   | 0.0003126992          |
| Methanobacterium            | -0.0222305556            | 0.8976015663          | -0.2011528456      | 0.2394372755          | 1.3199809909  | -851.2545217336   | 2.33084931317066E-005 |
| Myxococcus                  | 0.0298854299             | 0.8626206951          | -0.502960103       | 0.0020146217          | 0.6104927701  | -19.9990135023    | 0.0007479578          |
| Porphyromonas               | 0.0887507633             | 0.6945000219          | -0.2560770433      | 0.2500183316          | 0.289146152   | -2.8836058149     | 0.0009241011          |
| Prochlorococcus             | 0.4062753036             | 0.0107797241          | 0.0253036437       | 0.8783670412          | 15.8161328076 | -2.2742458066     | 0.1961558333          |
| Rhodobacter                 | -0.5                     | 0.1214291558          | -0.7818181818      | 0.0070121129          | 0.2041216285  | -0.091966454      | 0.0504024325          |
| Rhodopirellula              | -0.0207175235            | 0.9250525748          | -0.5548964139      | 0.0059921124          | 0.790250522   | -96.4408425634    | 0.000504267           |
| Spiroplasma                 | 0.2393162393             | 0.2282881749          | -0.7490842491      | 1.24966777067635E-005 | 1.7682111785  | -29.3523367065    | 0.0064639359          |
| Staphylococcus              | -0.0931451613            | 0.6169586777          | -0.9116935484      | 7.55137262061412E-008 | 1.238667744   | -2.5510849631     | 0.0835727133          |
| Streptococcus               | -0.3128851541            | 0.0676570391          | -0.943977591       | 0                     | 1.8591246303  | -11.8458256952    | 0.0416806827          |
| Sulfolobus                  | -0.4138904574            | 0.0566759494          | -0.9480519481      | 3.97738009413851E-006 | 1.2540135467  | -62.4437065058    | 0.0013793744          |
| Synechococcus               | 0.4864957265             | 0.0126122509          | -0.4844444444      | 0.0130342351          | 2.4460221709  | -0.0702163975     | 4.9054168419          |
| Leptotrichia                | -0.0285714286            | 1                     | -0.9428571429      | 0.0166666667          | 0.6836752584  | -15.1989367014    | 0.0186075988          |
| Ruegeria                    | 0.103030303              | 0.785018104           | -0.4666666667      | 0.1782193293          | 0.2487522074  | -3.1218398561     | 0.0124057428          |
| Atopobium                   | -0.358554489             | 0.1018781887          | -0.8430265387      | 0.000000871           | 0.6696239452  | -4.4327296023     | 0.0028153489          |
| Bifidobacterium             | 0.2                      | 0.4100098244          | -0.601754386       | 0.0075105622          | 0.3162132879  | 0.1084235625      | 0.0109659178          |
| Lactobacillus               | -0.0303030303            | 0.9457098084          | -0.9757575758      | 0                     | 0.9724045537  | -1.4384026105     | 0.1180761148          |
| Mycoplasma                  | 0.3552419355             | 0.0505457136          | -0.8524193548      | 4.8258055809074E-007  | 0.9993676428  | -33.7842023949    | 0.003027669           |
| Prevotella                  | -0.1823529412            | 0.4979213725          | -0.9764705882      | 0                     | 2.3123656689  | -64.3651237005    | 0.0024500631          |
| Shewanella                  | -0.1                     | 0.95                  | -0.9               | 0.0833333333          | 0.7163509017  | -0.9440151482     | 0.0276617615          |
| Spirochaeta                 | 0.0285714286             | 1                     | -0.0857142857      | 0.9194444444          | 0.1415578274  | -13.1350742861    | 0.0013635406          |
| Corynebacterium             | -0.0714285714            | 0.9063492063          | -0.3571428571      | 0.4444444444          | 0.3798208917  | 1.3208445271      | 0.0049118479          |
| Flavobacterium              | 0.1281761717             | 0.568312186           | -0.8927159797      | 3.19706976253081E-006 | 1.1341277571  | -0.1239339403     | 0.6624901891          |
| Neisseria                   | -0.2142857143            | 0.6615079365          | -0.6428571429      | 0.1388888889          | 0.1934000597  | -0.6000173031     | 0.046770624           |
| Vibrio                      | -0.3696969697            | 0.2956040892          | -0.9757575758      | 0                     | 1.0898577702  | -4.3502075622     | 0.0343918727          |
| Brachyspira                 | 0                        | 1                     | -0.75              | 0.0662698413          | 0.6816891301  | -26.8040952435    | 0.0062675438          |
| Coproccoccus                | -0.0286978514            | 0.9224205467          | -0.7483516645      | 0.0020787303          | 0.5972249469  | -128.5141800102   | 0.000224633           |
| Treponema                   | -0.6666666667            | 0.0830853175          | -0.9523809524      | 0.001140873           | 1.2788442978  | -393.2300271252   | 0.000489972           |
| Thermus                     | 0.6967032967             | 0.007343265           | -0.5912087912      | 0.0288937236          | 0.2070740535  | -1.7042496078     | 0.0525676916          |
| Haloferax                   | 0.1644325947             | 0.5581408249          | -0.2252011623      | 0.4196781971          | 0.4128272456  | -7.3942072781     | 0.0029201669          |
| Olsenella                   | -0.7181818182            | 0.0167992341          | -0.8               | 0.0052015025          | 0.3364084675  | -4.7355863648     | 0.0018903593          |
| Selenomonas                 | -0.1428571429            | 0.8027777778          | -0.7714285714      | 0.1027777778          | 1.0847197092  | -75.1076237115    | 0.0036546489          |
| Cellulophaga                | 0.6                      | 0.2416666667          | -0.9428571429      | 0.0166666667          | 1.6722300243  | -9.2681555217     | 0.0513465397          |
| Desulfovibrio               | -0.2                     | 0.7138888889          | -0.6               | 0.2416666667          | 0.1042627889  | -0.2308270493     | 0.064935013           |
| Bacillus                    | 0.6428571429             | 0.1388888889          | -0.8928571429      | 0.0123015873          | 0.8440946301  | -0.1930062559     | 0.2958520169          |
| Xylella                     | 0.6428571429             | 0.1388888889          | -0.8928571429      | 0.0123015873          | 1.0002495561  | -28.2940329388    | 0.0048490512          |

130 Tara Oceans samples calculated at the genus level.

131

132

133 **Supplementary Table 4:** Correlation scores between the viruses and the hosts across the  
 134 Tara Oceans samples calculated at the phylum level.

| Microbe             | Spearman_Score_Abundance | p_value_Abundance | Spearman_Score_VHR | p_value_VHR           | Intercept     | Coefficient      | Median_VHR   |
|---------------------|--------------------------|-------------------|--------------------|-----------------------|---------------|------------------|--------------|
| Bacteroidetes       | 0.487854251              | 0.0018440462      | -0.0587044534      | 0.7218046355          | 6.5718123628  | -0.8691127829    | 0.2942114454 |
| Proteobacteria      | 0.5700404858             | 0.0001969337      | 0.0714574899       | 0.6645328164          | 41.6510547139 | -2.8456391386    | 0.4728114824 |
| Chlamydiae          | 0.224785273              | 0.4824316437      | -0.3408034784      | 0.2783436757          | 1.3054541352  | -1125.5415903991 | 0.0001312777 |
| Cyanobacteria       | 0.4287449393             | 0.0068892257      | -0.1935222672      | 0.2369237852          | 21.7154380513 | -1.5670240917    | 1.631312893  |
| Nitrospirae         | -0.1552539658            | 0.4393705456      | -0.2415941814      | 0.2247315758          | 0.692990787   | -757.9028606154  | 0            |
| Chloroflexi         | 0.1402597403             | 0.5427637571      | -0.687012987       | 0.0008070563          | 0.4365735353  | -17.4971416845   | 0.0012303541 |
| Synergistetes       | -0.5303759999            | 0.0932731105      | -0.8560454736      | 0.0007716582          | 0.4207727833  | -77.497439152    | 0.0006656232 |
| Firmicutes          | 0.0495951417             | 0.7636823368      | -0.5718623482      | 0.0001862272          | 7.1450479718  | -10.3560829904   | 0.1007878894 |
| Planctomycetes      | 0.0298719772             | 0.8585100099      | -0.644162381       | 2.0270257907871E-005  | 1.1593147267  | -20.0764366062   | 0.0053903494 |
| Euryarchaeota       | -0.3380566802            | 0.03586063        | -0.6386639676      | 1.9170771177978E-005  | 11.0498598531 | -1047.2704950545 | 0.0007424886 |
| Spirochaetes        | 0.2519969362             | 0.1267868461      | -0.6544479702      | 1.37698760641859E-005 | 2.3641307508  | -19.8223758252   | 0.0128895901 |
| Crenarchaeota       | 0.0786738155             | 0.6376082776      | -0.7439544808      | 4.98082163215247E-007 | 2.1539224633  | -108.6354586489  | 0.0013896698 |
| Actinobacteria      | -0.1083451873            | 0.5218849548      | -0.7598387862      | 4.2867457596182E-007  | 2.1527612906  | -1.161736751     | 0.2030214715 |
| Deinococcus-Thermus | 0.0512091038             | 0.7627878024      | -0.8477951636      | 1.14534805773338E-008 | 0.5870313379  | -4.3343088481    | 0.0229846302 |
| Fusobacteria        | -0.0440967283            | 0.7950393182      | -0.9229492651      | 0                     | 0.9894272934  | -2.9219067318    | 0.0236006339 |
| Tenericutes         | -0.14048583              | 0.3922637652      | -0.8967611336      | 0                     | 3.4383676516  | -11.5564472183   | 0.0044451534 |

135

136 **Supplementary References:**

137 Angly FE., Felts B., Breitbart M., Salamon P., Edwards RA., Carlson C., Chan AM., Haynes  
 138 M., Kelley S., Liu H., Mahaffy JM., Mueller JE., Nulton J., Olson R., Parsons R., Rayhawk  
 139 S., Suttle CA., Rohwer F. 2006. The marine viromes of four oceanic regions. PLoS Biol  
 140 4:e368.

141 Cassman N., Prieto-Davo A., Walsh K., Silva GG., Angly F., Akhter S., Barott K., Busch J.,  
 142 McDole T., Haggerty JM., Willner D., Alarcon G., Ulloa O., DeLong EF., Dutilh BE., Rohwer  
 143 F., Dinsdale EA. 2012. Oxygen minimum zones harbour novel viral communities with low  
 144 diversity. Environ Microbiol 14:3043–3065.

145 Dinsdale EA., Pantos O., Smriga S., Edwards RA., Angly F., Hatay M., Hall D., Brown E.,  
 146 Haynes M., Krause L., Sala E., Stuart A., Thurber RV., Willis BL., Azam F., Knowlton N.,  
 147 Rohwer F. 2008. Microbial Ecology of Four Coral Atolls in the Northern Line Islands. 3.

148 Hurwitz BL., Sullivan MB. 2013. The Pacific Ocean virome (POV): a marine viral  
 149 metagenomic dataset and associated protein clusters for quantitative viral ecology. PLoS

150 One 8:e57355.

151 Solonenko S a., Ignacio-Espinoza JC., Alberti A., Cruaud C., Hallam S., Konstantinidis K.,  
152 Tyson G., Wincker P., Sullivan MB. 2013. Sequencing platform and library preparation  
153 choices impact viral metagenomes. BMC genomics 14:320.

154 Vega Thurber RL., Barott KL., Hall D., Liu H., Rodriguez-Mueller B., Desnues C., Edwards  
155 RA., Haynes M., Angly FE., Wegley L., Rohwer FL. 2008. Metagenomic analysis indicates  
156 that stressors induce production of herpes-like viruses in the coral *Porites compressa*.  
157 Proceedings of the National Academy of Sciences of the United States of America  
158 105:18413–18418.

159 Weynberg KD., Wood-Charlson EM., Suttle CA., van Oppen MJ. 2014. Generating viral  
160 metagenomes from the coral holobiont. Front Microbiol 5:206.

161 Williamson SJ., Allen LZ., Lorenzi H a., Fadrosch DW., Bami D., Thiagarajan M., McCrow  
162 JP., Tovchigrechko A., Yooseph S., Venter JC. 2012. Metagenomic exploration of viruses  
163 throughout the Indian Ocean. PLoS one 7:e42047.

164 Yoshida M., Takaki Y., Eitoku M., Nunoura T., Takai K. 2013. Metagenomic Analysis of Viral  
165 Communities in (Hado)Pelagic Sediments. PLoS ONE 8.

166

167
